# Supplementary material for: Gene expression-based screening for inhibitors of PDGFR signaling
Source: PubMed Central journal article supplement (PMC2397499; doi:10.1186/gb-2008-9-3-r47), 2008-03-01
Supplement: gb-2008-9-3-r47-S2.pdf [file gb-2008-9-3-r47-S2.pdf]

**A**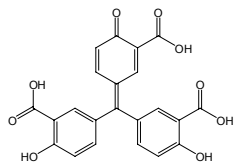

Aurintricarboxylic Acid

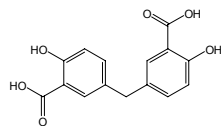

5,5'-Methylenedisalicylic Acid

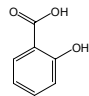

Salicylic Acid

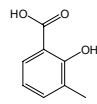

3-Methylsalicylic Acid

**B**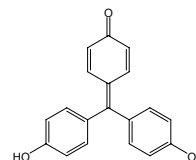

Aurin

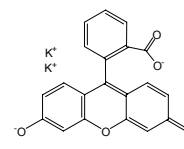

Urochrome

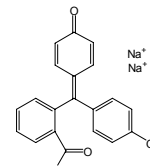

Phenolphthalein Sodium Salt

**C**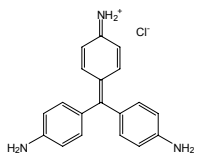

Pararosaniline Hydrochloride

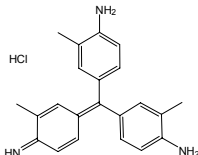

Basic Violet 2

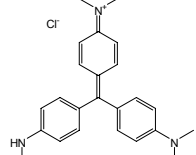

Methyl Violet 2B

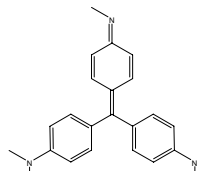

Methyl Violet B base

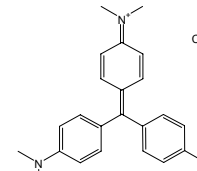

Basic Violet 3 Check

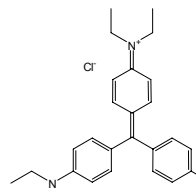

Ethyl Violet

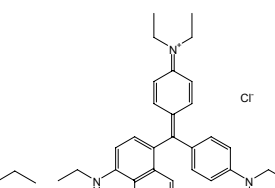

Victoria Pure Blue BO

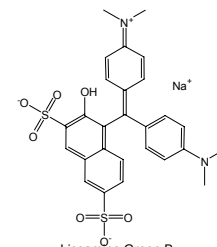

Lissamine Green B

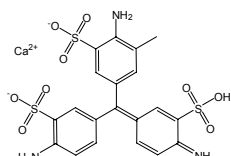

Acid Fuchsin Calcium Salt

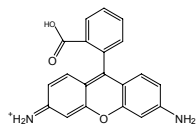

Rhodamine 110 Chloride

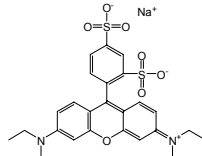

Sulforhodamine B

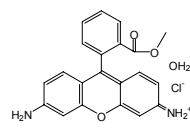

Rhodamine 123 Hydrate

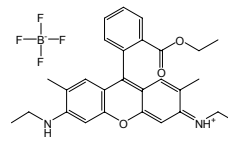

Rhodamine 6 G Tetrafluoroborate

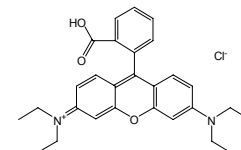

Rhodamine B

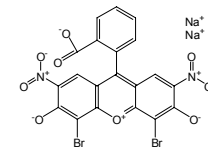

Eosin B

Figure S1. ATA analogs. A. Compounds used to test importance of the skeletal-triphenylmethane structure of ATA for its activity. B. Compounds used to evaluate the role the carboxyl or hydroxyl groups. C. Compounds used to test the effect of various modifications of the phenyl rings on the inhibitory properties of ATA.
